# Supplementary material
Source: Springer Nature journal article supplement (https://www.springermedizin.de/resource/supplementary/12906_2013_1486_MOESM6_ESM.pdf/9522024)

**1. Puerarin**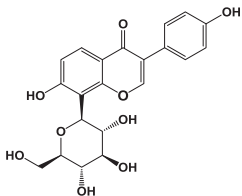**2. Daidizin**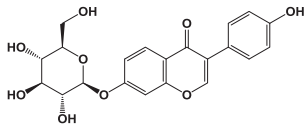**3. Iiquiritin**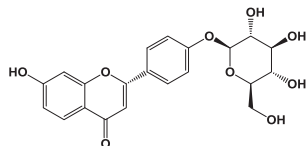**4. Naringin**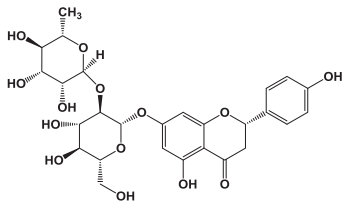**5. Hesperidin**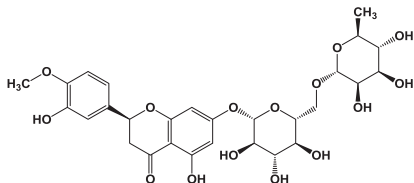**6. Neohesperidin**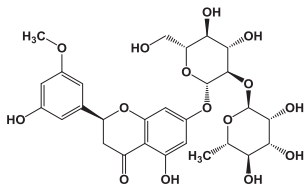**7. Glycyrrhizin**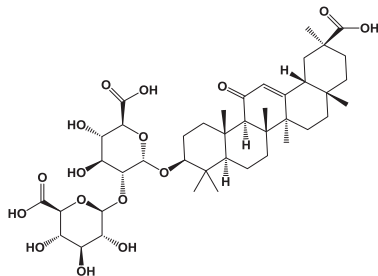

Supplement: MOESM6 [file 9522024]
